# Supplementary material for: Using the similarity theory and dimensional analysis to quantify the periodic dependence of the properties of chemical elements
Source: Royal Society of Chemistry journal article supplement (doi:10.1039/d3ra00927k), 2023-01-01
Supplement: d3ra00927k1.pdf [file d3ra00927k1.pdf]

## *Electronic Supplementary Information*

### Using the similarity theory and dimensional analysis to quantify the periodic dependence of the properties of chemical elements

Vyacheslav S. Protsenko

**Table S1** Literature and calculation data used for analysis

| Chemical element | Atomic number,<br>$\pi_1 \equiv Z$ | Atomic radius,<br>$r / \text{Å}$<br>[29] | Ionization energy,<br>$I_1 / \text{eV}$ [47] | Dimensionless quantities of complex type    |                                 |                                                   |                                               |
|------------------|------------------------------------|------------------------------------------|----------------------------------------------|---------------------------------------------|---------------------------------|---------------------------------------------------|-----------------------------------------------|
|                  |                                    |                                          |                                              | $\pi_2 = \frac{\varepsilon_0 r I_1}{Q_N^2}$ | $\pi_3 = \frac{m r^2 I_1}{h^2}$ | $\pi_4 = \frac{I_1 \varepsilon_0^2 h^2}{m Q_e^4}$ | $\pi_5 = \frac{r m Q_e^2}{\varepsilon_0 h^2}$ |
| H                | 1                                  | 0.727                                    | 13.598                                       | 5.464E-02                                   | 2.389E-02                       | 1.250E-01                                         | 4.372E-01                                     |
| He               | 2                                  | 1.286                                    | 24.587                                       | 4.369E-02                                   | 1.352E-01                       | 2.260E-01                                         | 7.734E-01                                     |
| Li               | 3                                  | 1.374                                    | 5.392                                        | 4.550E-03                                   | 3.384E-02                       | 4.956E-02                                         | 8.263E-01                                     |
| Be               | 4                                  | 1.09                                     | 9.323                                        | 3.510E-03                                   | 3.682E-02                       | 8.569E-02                                         | 6.555E-01                                     |
| B                | 5                                  | 0.933                                    | 8.298                                        | 1.712E-03                                   | 2.401E-02                       | 7.626E-02                                         | 5.611E-01                                     |
| C                | 6                                  | 0.891                                    | 11.26                                        | 1.540E-03                                   | 2.971E-02                       | 1.035E-01                                         | 5.358E-01                                     |
| N                | 7                                  | 0.932                                    | 14.534                                       | 1.528E-03                                   | 4.196E-02                       | 1.336E-01                                         | 5.605E-01                                     |
| O                | 8                                  | 0.997                                    | 13.618                                       | 1.173E-03                                   | 4.500E-02                       | 1.252E-01                                         | 5.996E-01                                     |
| F                | 9                                  | 1.089                                    | 17.423                                       | 1.295E-03                                   | 6.868E-02                       | 1.601E-01                                         | 6.549E-01                                     |
| Ne               | 10                                 | 1.409                                    | 21.565                                       | 1.679E-03                                   | 1.423E-01                       | 1.982E-01                                         | 8.474E-01                                     |
| Na               | 11                                 | 1.701                                    | 5.139                                        | 3.993E-04                                   | 4.943E-02                       | 4.723E-02                                         | 1.023E+00                                     |
| Mg               | 12                                 | 1.508                                    | 7.646                                        | 4.426E-04                                   | 5.780E-02                       | 7.027E-02                                         | 9.069E-01                                     |
| Al               | 13                                 | 1.355                                    | 5.986                                        | 2.653E-04                                   | 3.653E-02                       | 5.502E-02                                         | 8.149E-01                                     |
| Si               | 14                                 | 1.269                                    | 8.152                                        | 2.917E-04                                   | 4.364E-02                       | 7.492E-02                                         | 7.632E-01                                     |
| P                | 15                                 | 1.223                                    | 10.487                                       | 3.151E-04                                   | 5.214E-02                       | 9.638E-02                                         | 7.355E-01                                     |
| S                | 16                                 | 1.293                                    | 10.36                                        | 2.892E-04                                   | 5.757E-02                       | 9.522E-02                                         | 7.776E-01                                     |
| Cl               | 17                                 | 1.431                                    | 12.968                                       | 3.549E-04                                   | 8.827E-02                       | 1.192E-01                                         | 8.606E-01                                     |
| Ar               | 18                                 | 1.933                                    | 15.76                                        | 5.197E-04                                   | 1.957E-01                       | 1.448E-01                                         | 1.162E+00                                     |
| K                | 19                                 | 2.151                                    | 4.341                                        | 1.430E-04                                   | 6.676E-02                       | 3.990E-02                                         | 1.294E+00                                     |
| Ca               | 20                                 | 1.761                                    | 6.113                                        | 1.488E-04                                   | 6.301E-02                       | 5.618E-02                                         | 1.059E+00                                     |
| Sc               | 21                                 | 1.466                                    | 6.562                                        | 1.206E-04                                   | 4.688E-02                       | 6.031E-02                                         | 8.816E-01                                     |
| Ti               | 22                                 | 1.308                                    | 6.828                                        | 1.020E-04                                   | 3.883E-02                       | 6.275E-02                                         | 7.866E-01                                     |
| V                | 23                                 | 1.209                                    | 6.746                                        | 8.522E-05                                   | 3.278E-02                       | 6.200E-02                                         | 7.271E-01                                     |
| Cr               | 24                                 | 1.162                                    | 6.767                                        | 7.545E-05                                   | 3.037E-02                       | 6.219E-02                                         | 6.988E-01                                     |
| Mn               | 25                                 | 1.136                                    | 7.434                                        | 7.468E-05                                   | 3.189E-02                       | 6.832E-02                                         | 6.832E-01                                     |
| Fe               | 26                                 | 1.131                                    | 7.902                                        | 7.307E-05                                   | 3.360E-02                       | 7.263E-02                                         | 6.802E-01                                     |
| Co               | 27                                 | 1.137                                    | 7.881                                        | 6.794E-05                                   | 3.387E-02                       | 7.243E-02                                         | 6.838E-01                                     |
| Ni               | 28                                 | 1.16                                     | 7.64                                         | 6.248E-05                                   | 3.417E-02                       | 7.022E-02                                         | 6.976E-01                                     |
| Cu               | 29                                 | 1.203                                    | 7.726                                        | 6.108E-05                                   | 3.717E-02                       | 7.101E-02                                         | 7.235E-01                                     |
| Zn               | 30                                 | 1.32                                     | 9.394                                        | 7.615E-05                                   | 5.441E-02                       | 8.634E-02                                         | 7.938E-01                                     |
| Ga               | 31                                 | 1.365                                    | 5.999                                        | 4.710E-05                                   | 3.715E-02                       | 5.514E-02                                         | 8.209E-01                                     |
| Ge               | 32                                 | 1.365                                    | 7.899                                        | 5.820E-05                                   | 4.892E-02                       | 7.260E-02                                         | 8.209E-01                                     |
| As               | 33                                 | 1.369                                    | 9.789                                        | 6.802E-05                                   | 6.098E-02                       | 8.997E-02                                         | 8.233E-01                                     |
| Se               | 34                                 | 1.418                                    | 9.752                                        | 6.612E-05                                   | 6.518E-02                       | 8.963E-02                                         | 8.528E-01                                     |
| Br               | 35                                 | 1.551                                    | 11.814                                       | 8.268E-05                                   | 9.447E-02                       | 1.086E-01                                         | 9.328E-01                                     |
| Kr               | 36                                 | 2.077                                    | 14                                           | 1.240E-04                                   | 2.008E-01                       | 1.287E-01                                         | 1.249E+00                                     |
| Rb               | 37                                 | 2.319                                    | 4.177                                        | 3.911E-05                                   | 7.467E-02                       | 3.839E-02                                         | 1.395E+00                                     |
| Sr               | 38                                 | 1.935                                    | 5.695                                        | 4.218E-05                                   | 7.088E-02                       | 5.234E-02                                         | 1.164E+00                                     |
| Y                | 39                                 | 1.625                                    | 6.217                                        | 3.671E-05                                   | 5.457E-02                       | 5.714E-02                                         | 9.773E-01                                     |
| Zr               | 40                                 | 1.463                                    | 6.634                                        | 3.353E-05                                   | 4.720E-02                       | 6.097E-02                                         | 8.798E-01                                     |
| Nb               | 41                                 | 1.362                                    | 6.759                                        | 3.027E-05                                   | 4.168E-02                       | 6.212E-02                                         | 8.191E-01                                     |
| Mo               | 42                                 | 1.294                                    | 7.092                                        | 2.875E-05                                   | 3.947E-02                       | 6.518E-02                                         | 7.782E-01                                     |
| Tc               | 43                                 | 1.257                                    | 7.28                                         | 2.735E-05                                   | 3.824E-02                       | 6.691E-02                                         | 7.559E-01                                     |
| Ru               | 44                                 | 1.249                                    | 7.361                                        | 2.625E-05                                   | 3.817E-02                       | 6.765E-02                                         | 7.511E-01                                     |
| Rh               | 45                                 | 1.264                                    | 7.459                                        | 2.573E-05                                   | 3.961E-02                       | 6.855E-02                                         | 7.602E-01                                     |

|    |    |       |        |           |           |           |           |
|----|----|-------|--------|-----------|-----------|-----------|-----------|
| Pd | 46 | 1.306 | 8.337  | 2.844E-05 | 4.727E-02 | 7.662E-02 | 7.854E-01 |
| Ag | 47 | 1.379 | 7.576  | 2.614E-05 | 4.789E-02 | 6.963E-02 | 8.293E-01 |
| Cd | 48 | 1.509 | 8.994  | 3.256E-05 | 6.808E-02 | 8.266E-02 | 9.075E-01 |
| In | 49 | 1.541 | 5.786  | 2.053E-05 | 4.567E-02 | 5.318E-02 | 9.267E-01 |
| Sn | 50 | 1.541 | 7.344  | 2.502E-05 | 5.797E-02 | 6.750E-02 | 9.267E-01 |
| Sb | 51 | 1.553 | 8.608  | 2.841E-05 | 6.901E-02 | 7.911E-02 | 9.340E-01 |
| Te | 52 | 1.596 | 9.01   | 2.939E-05 | 7.629E-02 | 8.281E-02 | 9.598E-01 |
| I  | 53 | 1.721 | 10.451 | 3.539E-05 | 1.029E-01 | 9.605E-02 | 1.035E+00 |
| Xe | 54 | 2.344 | 12.13  | 5.389E-05 | 2.215E-01 | 1.115E-01 | 1.410E+00 |
| Cs | 55 | 2.535 | 3.894  | 1.804E-05 | 8.318E-02 | 3.579E-02 | 1.525E+00 |
| Ba | 56 | 1.962 | 5.212  | 1.802E-05 | 6.669E-02 | 4.790E-02 | 1.180E+00 |
| La | 57 | 1.647 | 5.577  | 1.563E-05 | 5.029E-02 | 5.126E-02 | 9.905E-01 |
| Ce | 58 | 1.467 | 5.539  | 1.335E-05 | 3.962E-02 | 5.091E-02 | 8.822E-01 |
| Pr | 59 | 1.367 | 5.473  | 1.188E-05 | 3.400E-02 | 5.030E-02 | 8.221E-01 |
| Nd | 60 | 1.32  | 5.525  | 1.120E-05 | 3.200E-02 | 5.078E-02 | 7.938E-01 |
| Pm | 61 | 1.635 | 5.582  | 1.356E-05 | 4.960E-02 | 5.130E-02 | 9.833E-01 |
| Sm | 62 | 1.626 | 5.644  | 1.320E-05 | 4.960E-02 | 5.187E-02 | 9.779E-01 |
| Eu | 63 | 1.62  | 5.67   | 1.279E-05 | 4.946E-02 | 5.211E-02 | 9.743E-01 |
| Gd | 64 | 1.623 | 6.15   | 1.347E-05 | 5.385E-02 | 5.652E-02 | 9.761E-01 |
| Tb | 65 | 1.613 | 5.864  | 1.237E-05 | 5.071E-02 | 5.389E-02 | 9.700E-01 |
| Dy | 66 | 1.613 | 5.939  | 1.216E-05 | 5.136E-02 | 5.458E-02 | 9.700E-01 |
| Ho | 67 | 1.604 | 6.022  | 1.189E-05 | 5.150E-02 | 5.535E-02 | 9.646E-01 |
| Er | 68 | 1.602 | 6.108  | 1.170E-05 | 5.211E-02 | 5.614E-02 | 9.634E-01 |
| Tm | 69 | 1.602 | 6.184  | 1.150E-05 | 5.275E-02 | 5.684E-02 | 9.634E-01 |
| Yb | 70 | 1.759 | 6.254  | 1.241E-05 | 6.432E-02 | 5.748E-02 | 1.058E+00 |
| Lu | 71 | 1.605 | 5.426  | 9.549E-06 | 4.646E-02 | 4.987E-02 | 9.652E-01 |
| Hf | 72 | 1.454 | 6.825  | 1.058E-05 | 4.796E-02 | 6.273E-02 | 8.744E-01 |
| Ta | 73 | 1.358 | 7.55   | 1.063E-05 | 4.628E-02 | 6.939E-02 | 8.167E-01 |
| W  | 74 | 1.316 | 7.864  | 1.045E-05 | 4.527E-02 | 7.228E-02 | 7.914E-01 |
| Re | 75 | 1.287 | 7.834  | 9.907E-06 | 4.313E-02 | 7.200E-02 | 7.740E-01 |
| Os | 76 | 1.278 | 8.438  | 1.032E-05 | 4.581E-02 | 7.755E-02 | 7.686E-01 |
| Ir | 77 | 1.288 | 8.967  | 1.077E-05 | 4.945E-02 | 8.241E-02 | 7.746E-01 |
| Pt | 78 | 1.311 | 8.959  | 1.067E-05 | 5.118E-02 | 8.234E-02 | 7.884E-01 |
| Au | 79 | 1.374 | 9.226  | 1.123E-05 | 5.790E-02 | 8.479E-02 | 8.263E-01 |
| Hg | 80 | 1.556 | 10.438 | 1.403E-05 | 8.400E-02 | 9.593E-02 | 9.358E-01 |
| Tl | 81 | 1.617 | 6.108  | 8.320E-06 | 5.309E-02 | 5.614E-02 | 9.724E-01 |
| Pb | 82 | 1.622 | 7.417  | 9.889E-06 | 6.486E-02 | 6.817E-02 | 9.755E-01 |
| Bi | 83 | 1.635 | 7.286  | 9.558E-06 | 6.474E-02 | 6.696E-02 | 9.833E-01 |
| Po | 84 | 1.67  | 8.417  | 1.101E-05 | 7.803E-02 | 7.736E-02 | 1.004E+00 |
| At | 85 | 1.777 | 9.318  | 1.267E-05 | 9.780E-02 | 8.564E-02 | 1.069E+00 |
| Rn | 86 | 2.544 | 10.749 | 2.044E-05 | 2.312E-01 | 9.879E-02 | 1.530E+00 |

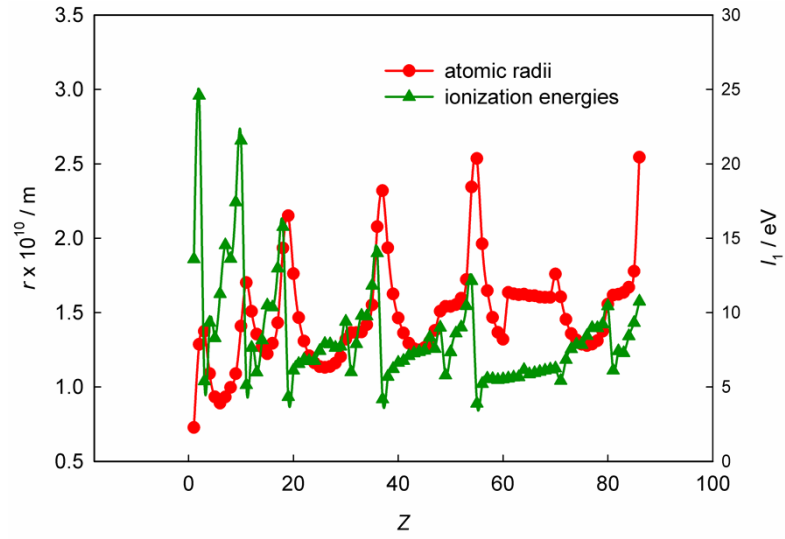

**Fig. S1** Dependences of the radius of atoms and the first ionization energy on the atomic number of the elements in the periodic system.

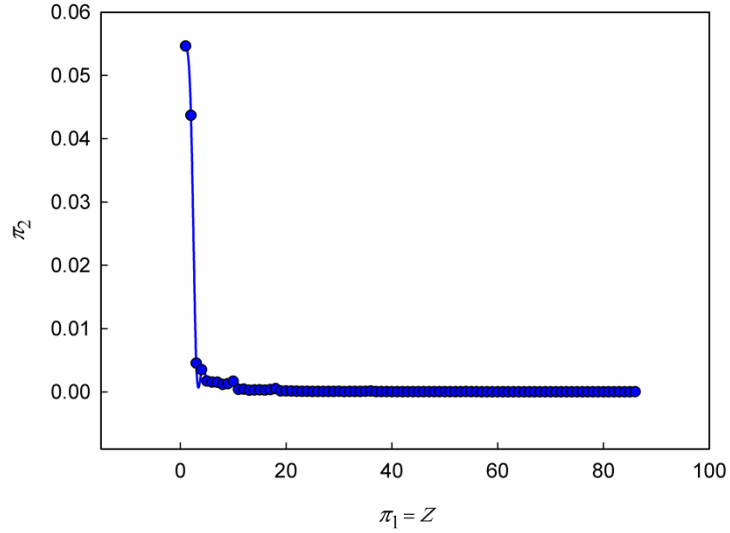

**Fig. S2** Calculated dependence  $\pi_2$  vs.  $\pi_1$ .

Formulae for approximate calculation of  $a_j$  and  $b_j$  values in the Fourier series (15):

$$a_j = \frac{2}{86} \sum_{k=0}^{85} \pi_i \cos j \frac{2\pi k}{85},$$

$$b_j = \frac{2}{86} \sum_{k=0}^{85} \pi_i \sin j \frac{2\pi k}{85},$$

Formulae for calculating the values of  $A_j$  and  $\varphi_j$  in the series (16):

$$A_j = \sqrt{a_j^2 + b_j^2},$$

$$\text{tg} \varphi_j = \frac{b_j}{a_j}$$

**Table S2** Fourier expansion parameters for the quantity  $\pi_2$ 

| $j$ | $a_j$   | $b_j$   | $A_j$   | $\varphi_j$ |
|-----|---------|---------|---------|-------------|
| 0   | 0.00281 | 0.00000 | 0.00281 | 0.00000     |
| 1   | 0.00267 | 0.00028 | 0.00268 | 0.10502     |
| 2   | 0.00253 | 0.00042 | 0.00256 | 0.16573     |
| 3   | 0.00240 | 0.00050 | 0.00245 | 0.20743     |
| 4   | 0.00230 | 0.00055 | 0.00236 | 0.23442     |
| 5   | 0.00223 | 0.00059 | 0.00231 | 0.26017     |
| 6   | 0.00215 | 0.00064 | 0.00225 | 0.28731     |
| 7   | 0.00209 | 0.00066 | 0.00220 | 0.30601     |
| 8   | 0.00205 | 0.00069 | 0.00217 | 0.32391     |
| 9   | 0.00202 | 0.00073 | 0.00215 | 0.34533     |
| 10  | 0.00199 | 0.00080 | 0.00214 | 0.38197     |
| 11  | 0.00191 | 0.00086 | 0.00210 | 0.42478     |
| 12  | 0.00182 | 0.00091 | 0.00204 | 0.46373     |
| 13  | 0.00173 | 0.00093 | 0.00197 | 0.49491     |
| 14  | 0.00165 | 0.00093 | 0.00190 | 0.51453     |
| 15  | 0.00159 | 0.00094 | 0.00185 | 0.53542     |
| 16  | 0.00152 | 0.00095 | 0.00179 | 0.55640     |
| 17  | 0.00146 | 0.00095 | 0.00174 | 0.57611     |
| 18  | 0.00140 | 0.00095 | 0.00170 | 0.59638     |
| 19  | 0.00135 | 0.00096 | 0.00166 | 0.61528     |
| 20  | 0.00129 | 0.00097 | 0.00162 | 0.64483     |
| 21  | 0.00122 | 0.00098 | 0.00156 | 0.67881     |
| 22  | 0.00113 | 0.00097 | 0.00149 | 0.70955     |
| 23  | 0.00105 | 0.00094 | 0.00141 | 0.73079     |
| 24  | 0.00100 | 0.00091 | 0.00135 | 0.73726     |
| 25  | 0.00095 | 0.00088 | 0.00129 | 0.74871     |
| 26  | 0.00090 | 0.00085 | 0.00124 | 0.75908     |
| 27  | 0.00085 | 0.00083 | 0.00118 | 0.77084     |
| 28  | 0.00080 | 0.00080 | 0.00113 | 0.78359     |
| 29  | 0.00076 | 0.00077 | 0.00108 | 0.79026     |
| 30  | 0.00071 | 0.00075 | 0.00103 | 0.81641     |
| 31  | 0.00064 | 0.00073 | 0.00097 | 0.84715     |
| 32  | 0.00057 | 0.00068 | 0.00089 | 0.87315     |
| 33  | 0.00051 | 0.00062 | 0.00080 | 0.88358     |
| 34  | 0.00047 | 0.00055 | 0.00072 | 0.86031     |
| 35  | 0.00044 | 0.00048 | 0.00066 | 0.83073     |
| 36  | 0.00042 | 0.00043 | 0.00060 | 0.79510     |
| 37  | 0.00039 | 0.00037 | 0.00054 | 0.75471     |
| 38  | 0.00037 | 0.00031 | 0.00048 | 0.69078     |
| 39  | 0.00035 | 0.00025 | 0.00043 | 0.61841     |
| 40  | 0.00033 | 0.00019 | 0.00038 | 0.53165     |
| 41  | 0.00030 | 0.00013 | 0.00033 | 0.39459     |
| 42  | 0.00028 | 0.00005 | 0.00029 | 0.16879     |

**Table S3** Fourier expansion parameters for the quantity  $\pi_3$ 

| $j$ | $a_j$    | $b_j$    | $A_j$   | $\varphi_j$ |
|-----|----------|----------|---------|-------------|
| 0   | 0.12309  | 0.00000  | 0.12309 | 0.00000     |
| 1   | 0.00291  | 0.00079  | 0.00302 | 0.26514     |
| 2   | 0.00979  | 0.00600  | 0.01148 | 0.54931     |
| 3   | 0.00661  | -0.00155 | 0.00679 | -0.23015    |
| 4   | -0.00528 | -0.01079 | 0.01201 | 1.11594     |
| 5   | 0.02547  | 0.00025  | 0.02547 | 0.00965     |
| 6   | -0.00162 | -0.00447 | 0.00476 | 1.22356     |
| 7   | 0.00250  | -0.00006 | 0.00250 | -0.02507    |
| 8   | 0.00871  | -0.00298 | 0.00921 | -0.32950    |
| 9   | 0.00590  | -0.01364 | 0.01486 | -1.16224    |
| 10  | 0.01862  | 0.01023  | 0.02125 | 0.50220     |
| 11  | 0.01065  | 0.00235  | 0.01091 | 0.21752     |
| 12  | 0.00269  | 0.00432  | 0.00509 | 1.01441     |
| 13  | 0.00334  | 0.00672  | 0.00751 | 1.10916     |
| 14  | 0.00426  | -0.00940 | 0.01033 | -1.14503    |
| 15  | 0.00761  | 0.00529  | 0.00926 | 0.60729     |
| 16  | 0.00639  | -0.00121 | 0.00651 | -0.18645    |
| 17  | 0.00364  | -0.00155 | 0.00396 | -0.40272    |
| 18  | 0.00252  | 0.00236  | 0.00345 | 0.75127     |
| 19  | 0.00822  | -0.00704 | 0.01083 | -0.70808    |
| 20  | 0.00648  | 0.00521  | 0.00832 | 0.67710     |
| 21  | 0.00682  | 0.00512  | 0.00852 | 0.64364     |
| 22  | 0.00268  | 0.00268  | 0.00379 | 0.78638     |
| 23  | -0.00485 | 0.00425  | 0.00645 | -0.71951    |
| 24  | 0.00758  | -0.00335 | 0.00829 | -0.41652    |
| 25  | 0.00193  | 0.00135  | 0.00236 | 0.61115     |
| 26  | 0.00487  | 0.00302  | 0.00573 | 0.55430     |
| 27  | 0.00761  | 0.00058  | 0.00764 | 0.07652     |
| 28  | -0.00318 | -0.00032 | 0.00319 | 0.10027     |
| 29  | 0.01089  | -0.00237 | 0.01115 | -0.21446    |
| 30  | 0.00474  | 0.00195  | 0.00512 | 0.39055     |
| 31  | 0.00368  | 0.00530  | 0.00645 | 0.96416     |
| 32  | 0.00433  | 0.00418  | 0.00602 | 0.76738     |
| 33  | -0.00724 | -0.00042 | 0.00725 | 0.05813     |
| 34  | 0.00348  | -0.00072 | 0.00356 | -0.20390    |
| 35  | 0.00192  | -0.00142 | 0.00238 | -0.63645    |
| 36  | 0.00142  | 0.00083  | 0.00165 | 0.52872     |
| 37  | 0.00374  | 0.00533  | 0.00651 | 0.95836     |
| 38  | 0.00017  | -0.00460 | 0.00461 | -1.53489    |
| 39  | 0.00454  | 0.00294  | 0.00541 | 0.57451     |
| 40  | 0.00498  | 0.00281  | 0.00572 | 0.51430     |
| 41  | 0.00183  | 0.00187  | 0.00262 | 0.79514     |
| 42  | -0.00082 | 0.00836  | 0.00840 | -1.47304    |

**Table S4** Fourier expansion parameters for the quantity  $\pi_4$ 

| $j$ | $a_j$    | $b_j$    | $A_j$   | $\varphi_j$ |
|-----|----------|----------|---------|-------------|
| 0   | 0.15369  | 0.00000  | 0.15369 | 0.00000     |
| 1   | 0.01586  | 0.01223  | 0.02003 | 0.65698     |
| 2   | 0.01511  | 0.00660  | 0.01649 | 0.41201     |
| 3   | 0.00476  | 0.00405  | 0.00626 | 0.70502     |
| 4   | -0.00418 | 0.00516  | 0.00664 | -0.89019    |
| 5   | 0.00600  | -0.00025 | 0.00600 | -0.04091    |
| 6   | -0.00084 | 0.00466  | 0.00473 | -1.39303    |
| 7   | 0.00090  | 0.00194  | 0.00214 | 1.13639     |
| 8   | 0.00484  | -0.00155 | 0.00508 | -0.31016    |
| 9   | 0.00221  | -0.00776 | 0.00807 | -1.29294    |
| 10  | 0.01774  | -0.00261 | 0.01793 | -0.14627    |
| 11  | 0.01173  | 0.00244  | 0.01199 | 0.20542     |
| 12  | 0.00934  | 0.00665  | 0.01147 | 0.61872     |
| 13  | 0.00817  | 0.00807  | 0.01149 | 0.77936     |
| 14  | -0.00108 | 0.00042  | 0.00116 | -0.36719    |
| 15  | 0.00743  | 0.00237  | 0.00780 | 0.30890     |
| 16  | 0.00287  | 0.00008  | 0.00287 | 0.02681     |
| 17  | 0.00292  | 0.00104  | 0.00310 | 0.34093     |
| 18  | 0.00449  | 0.00304  | 0.00542 | 0.59488     |
| 19  | 0.00384  | -0.00185 | 0.00426 | -0.44961    |
| 20  | 0.00846  | 0.00378  | 0.00927 | 0.42080     |
| 21  | 0.00630  | 0.00598  | 0.00868 | 0.75932     |
| 22  | 0.00244  | 0.00692  | 0.00734 | 1.23241     |
| 23  | -0.00212 | 0.00723  | 0.00753 | -1.28518    |
| 24  | 0.00240  | 0.00059  | 0.00247 | 0.24085     |
| 25  | 0.00109  | 0.00350  | 0.00366 | 1.26812     |
| 26  | 0.00332  | 0.00204  | 0.00389 | 0.55074     |
| 27  | 0.00507  | 0.00132  | 0.00524 | 0.25554     |
| 28  | -0.00109 | 0.00218  | 0.00244 | -1.10768    |
| 29  | 0.00757  | -0.00153 | 0.00772 | -0.19892    |
| 30  | 0.00476  | 0.00404  | 0.00625 | 0.70334     |
| 31  | 0.00326  | 0.00646  | 0.00724 | 1.10360     |
| 32  | 0.00194  | 0.00581  | 0.00613 | 1.24859     |
| 33  | -0.00641 | 0.00525  | 0.00828 | -0.68624    |
| 34  | -0.00176 | 0.00059  | 0.00186 | -0.32448    |
| 35  | -0.00157 | 0.00083  | 0.00178 | -0.48846    |
| 36  | -0.00026 | 0.00130  | 0.00132 | -1.37278    |
| 37  | 0.00025  | 0.00303  | 0.00304 | 1.48879     |
| 38  | -0.00015 | -0.00030 | 0.00034 | 1.11101     |
| 39  | 0.00143  | 0.00300  | 0.00333 | 1.12619     |
| 40  | 0.00118  | 0.00345  | 0.00365 | 1.24221     |
| 41  | -0.00080 | 0.00250  | 0.00262 | -1.26280    |
| 42  | -0.00310 | 0.00540  | 0.00622 | -1.04994    |

**Table S5** Fourier expansion parameters for the quantity  $\pi_5$ 

| $j$ | $a_j$    | $b_j$    | $A_j$   | $\varphi_j$ |
|-----|----------|----------|---------|-------------|
| 0   | 1.78008  | 0.00000  | 1.78008 | 0.00000     |
| 1   | -0.03631 | -0.07118 | 0.07990 | 1.09908     |
| 2   | 0.00303  | 0.01606  | 0.01634 | 1.38425     |
| 3   | 0.03056  | -0.01139 | 0.03261 | -0.35672    |
| 4   | -0.00015 | -0.10112 | 0.10112 | 1.56930     |
| 5   | 0.15099  | 0.00470  | 0.15106 | 0.03111     |
| 6   | -0.00115 | -0.06059 | 0.06060 | 1.55185     |
| 7   | 0.01842  | -0.02255 | 0.02911 | -0.88591    |
| 8   | 0.04156  | -0.02167 | 0.04688 | -0.48067    |
| 9   | 0.06585  | -0.05361 | 0.08491 | -0.68332    |
| 10  | 0.03440  | 0.08549  | 0.09215 | 1.18825     |
| 11  | 0.04016  | 0.00874  | 0.04110 | 0.21421     |
| 12  | -0.00748 | -0.01072 | 0.01307 | 0.96120     |
| 13  | -0.01067 | 0.00497  | 0.01177 | -0.43574    |
| 14  | 0.06681  | -0.03409 | 0.07500 | -0.47189    |
| 15  | 0.00989  | 0.01922  | 0.02162 | 1.09535     |
| 16  | 0.03557  | 0.00243  | 0.03565 | 0.06807     |
| 17  | 0.03187  | -0.01100 | 0.03371 | -0.33251    |
| 18  | 0.01107  | -0.01108 | 0.01566 | -0.78595    |
| 19  | 0.04590  | -0.00228 | 0.04596 | -0.04973    |
| 20  | 0.00613  | 0.00904  | 0.01092 | 0.97542     |
| 21  | 0.01771  | 0.00494  | 0.01838 | 0.27189     |
| 22  | 0.01757  | -0.01350 | 0.02216 | -0.65510    |
| 23  | 0.00785  | -0.02344 | 0.02472 | -1.24749    |
| 24  | 0.03771  | 0.00351  | 0.03787 | 0.09289     |
| 25  | 0.02027  | -0.01161 | 0.02336 | -0.52015    |
| 26  | 0.01849  | 0.00370  | 0.01885 | 0.19755     |
| 27  | 0.03050  | 0.00310  | 0.03066 | 0.10131     |
| 28  | 0.02474  | -0.01867 | 0.03100 | -0.64645    |
| 29  | 0.02343  | 0.00611  | 0.02422 | 0.25506     |
| 30  | 0.02170  | -0.00129 | 0.02174 | -0.05928    |
| 31  | 0.02077  | -0.00522 | 0.02142 | -0.24614    |
| 32  | 0.02231  | -0.00628 | 0.02318 | -0.27428    |
| 33  | 0.02781  | -0.01229 | 0.03040 | -0.41607    |
| 34  | 0.02654  | -0.00162 | 0.02659 | -0.06095    |
| 35  | 0.02593  | -0.00300 | 0.02610 | -0.11511    |
| 36  | 0.02165  | -0.00036 | 0.02165 | -0.01677    |
| 37  | 0.02367  | 0.00228  | 0.02378 | 0.09616     |
| 38  | 0.03017  | -0.00596 | 0.03075 | -0.19502    |
| 39  | 0.02044  | -0.00326 | 0.02069 | -0.15797    |
| 40  | 0.02378  | 0.00202  | 0.02386 | 0.08482     |
| 41  | 0.02862  | -0.00042 | 0.02862 | -0.01456    |
| 42  | 0.02614  | -0.00063 | 0.02615 | -0.02392    |

The main results of alternative calculations when using the values of atomic radii borrowed from Clementi et al. [51]:

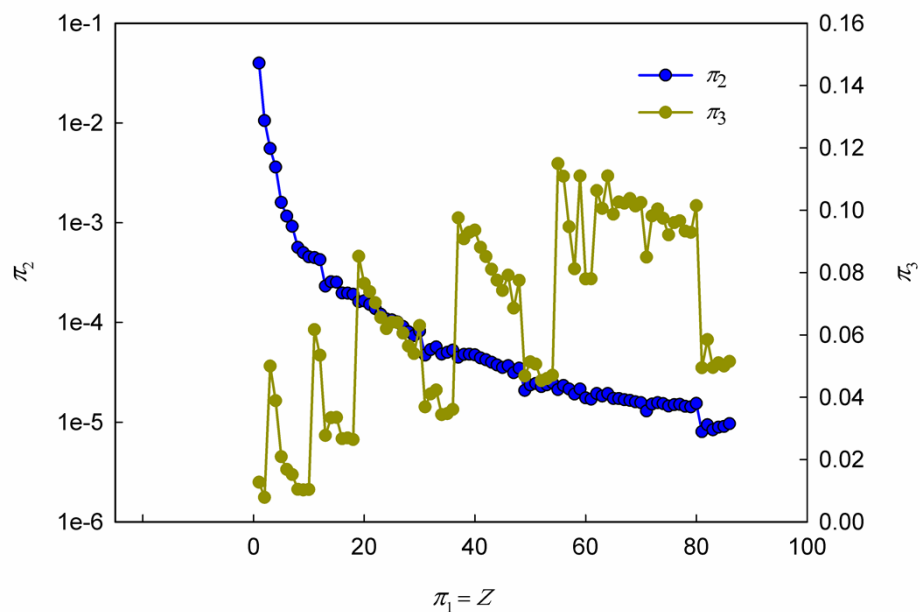

**Fig. S3** Calculated dependences  $\pi_2$  vs.  $\pi_1$  and  $\pi_3$  vs.  $\pi_1$ . For convenience, the values on the  $\pi_2$ -axis are plotted in logarithmic coordinates.

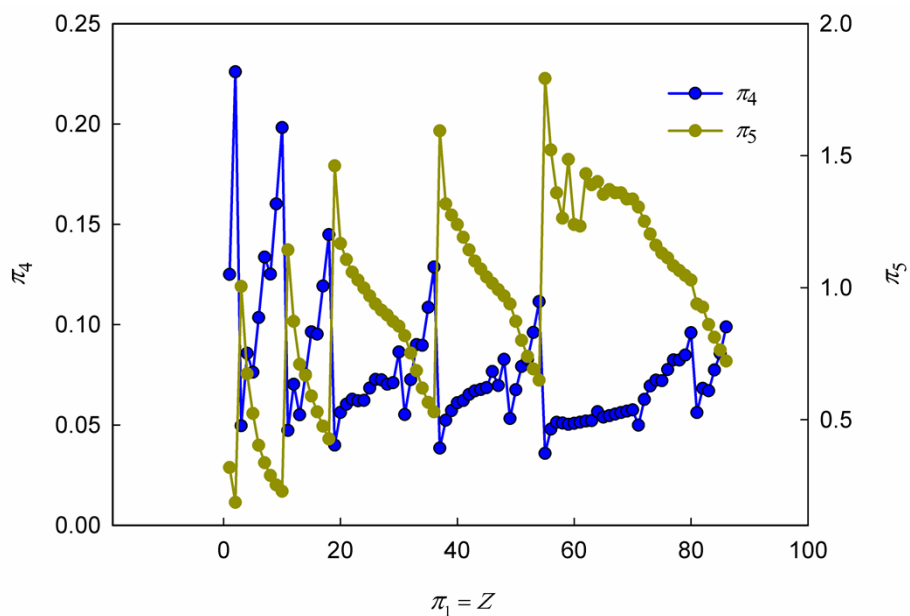

**Fig. S4** Calculated dependences  $\pi_4$  vs.  $\pi_1$  and  $\pi_5$  vs.  $\pi_1$ .



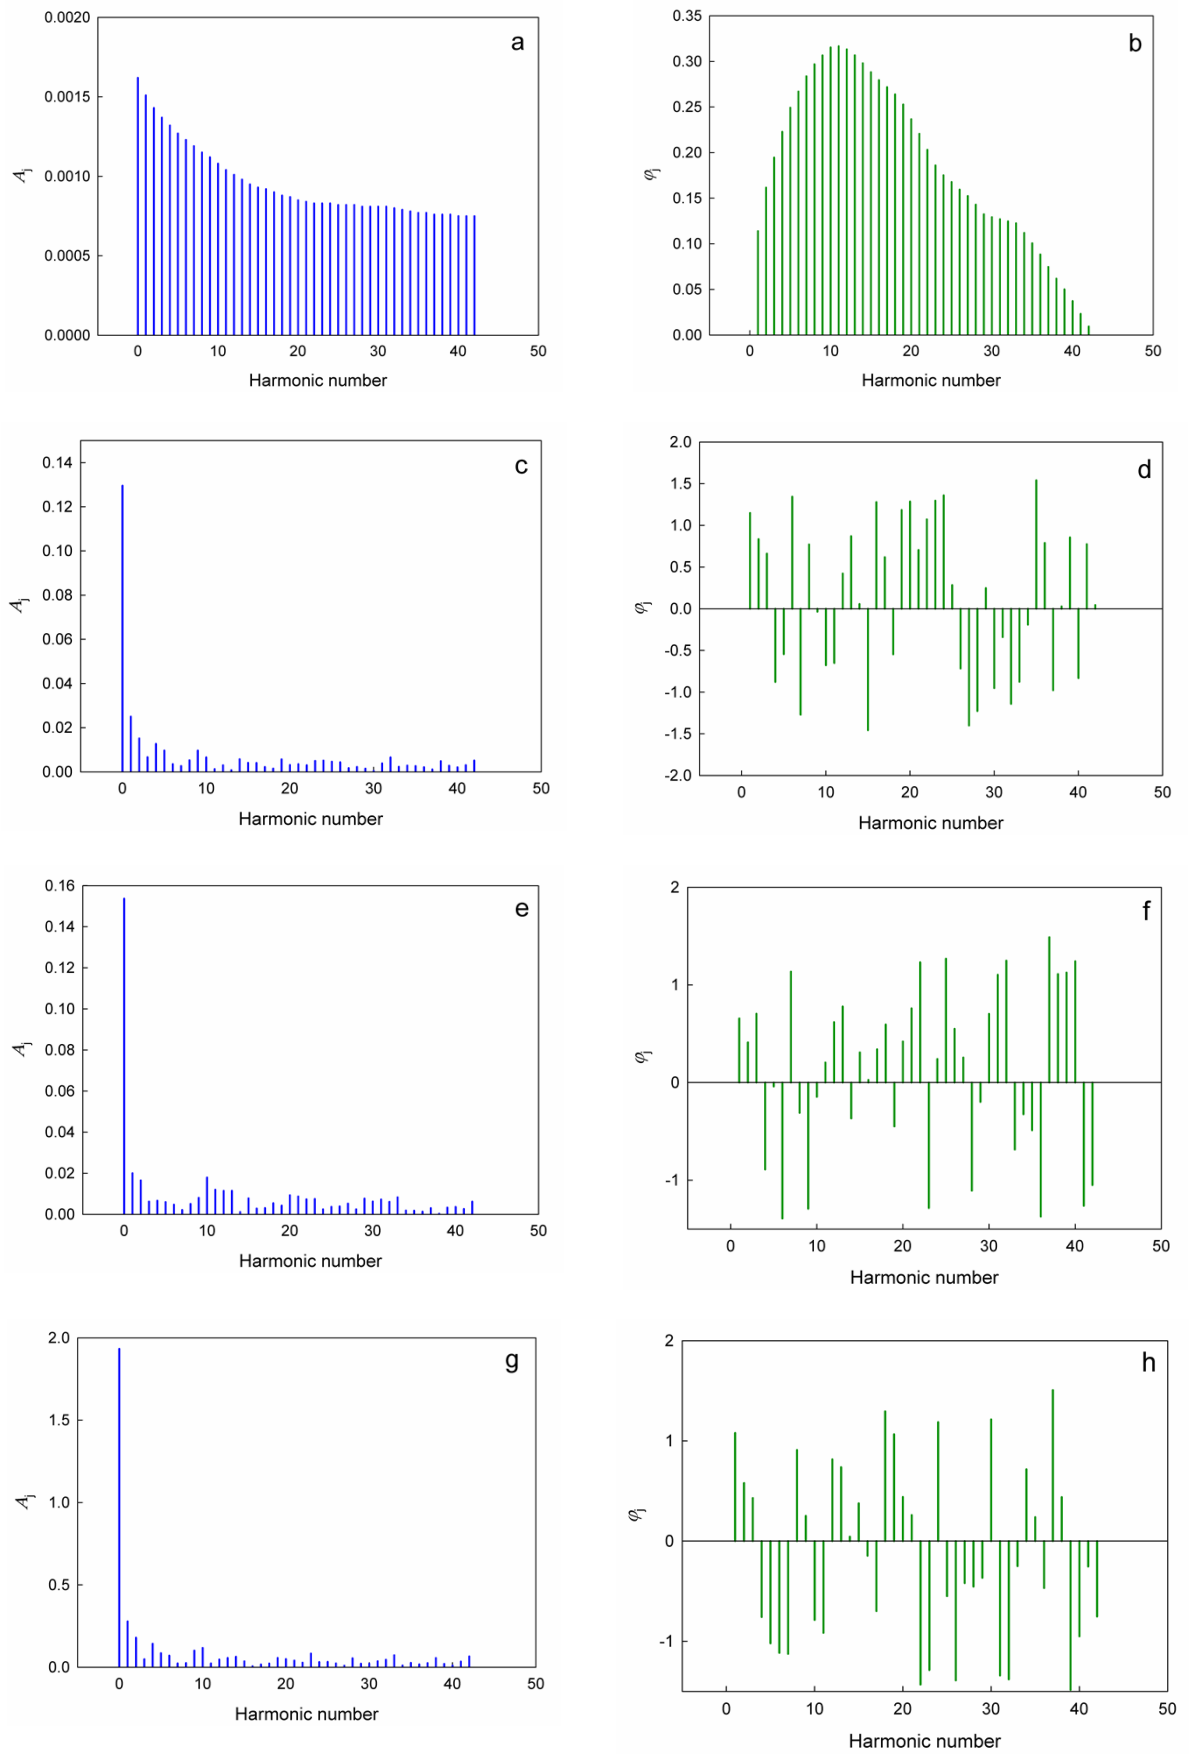

**Fig. S5** Amplitude spectra (a, c, e, and g) and frequency spectra (b, d, f, and h) of the expansions of the dimensionless complex quantities  $\pi_2$  (a and b),  $\pi_3$  (c and d),  $\pi_4$  (e and f) and  $\pi_5$  (g and h) in the Fourier series

(16).
